# Supplementary material for: More than 95% completeness of reported procedures in the population-based Dutch Arthroplasty Register: External validation of 311,890 procedures
Source: PubMed Central journal article supplement — Acta Orthop. 2015 Jul 21;86(4):498–505. doi: 10.3109/17453674.2015.1028307 (PMC4513607; doi:10.3109/17453674.2015.1028307), 2015-07-21
Supplement: ORT-86-498-s8011.pdf [file ORT-86-498-s8011.pdf]

## Supplementary article data

# More than 95% completeness of reported procedures in the population-based Dutch Arthroplasty Register

## External validation of 311,890 procedures

Liza N VAN STEENBERGEN<sup>1</sup>, Geke A W DENISSEN<sup>1</sup>, Anneke SPOOREN<sup>1</sup>, Stephanie M VAN ROODEN<sup>2</sup>, Frank J VAN OOSTERHOUT<sup>3</sup>, Jan W MORRENHOF<sup>4</sup>, and Rob G H H NELISSEN<sup>5</sup>

<sup>1</sup> Landelijke Registratie Orthopedische Implantaten (Dutch Arthroplasty Register), 's Hertogenbosch; <sup>2</sup> Department of Medical Statistics and Bioinformatics, Leiden University Medical Center, Leiden; <sup>3</sup> Department of Orthopedics, Rivas Medical Center, Gorinchem; <sup>4</sup> Department of Orthopedics, VieCuri Medical Center, Venlo; <sup>5</sup> Department of Orthopaedics, Leiden University Medical Center, Leiden, the Netherlands.

Correspondence: lroi@orthopeden.org

Submitted 2015-01-12. Accepted 2015-01-30.

Table 2. Surgical codes used to select procedures for comparison from the Vektis database and the hospital information system

|                            | Codes used to select procedures from Vektis <sup>a</sup>         | Codes used to select procedures from HIS <sup>b</sup>                       |
|----------------------------|------------------------------------------------------------------|-----------------------------------------------------------------------------|
| Total hip arthroplasty     | 131999051, 131999052, 199299025, 199299026, 170901033, 170901046 | 38567                                                                       |
| Hemiarthroplasty           | 199299009, 199299037, 199299038                                  | 28565                                                                       |
| Revision hip arthroplasty  | 192001007, 192001024                                             | 38568, 38569, 38560 <sup>c</sup><br>38570 <sup>c</sup> , 38565 <sup>c</sup> |
| Primary knee arthroplasty  | 131999103, 131999104                                             | 38663                                                                       |
| Revision knee arthroplasty | 192001008, 192001036                                             | 38664, 38665, 38666 <sup>c</sup>                                            |

<sup>a</sup> Codes based on a diagnosis treatment code generally used in the Dutch health care insurance system.

<sup>b</sup> Codes based on CTG codes generally used in the Dutch health care system.

<sup>c</sup> Codes sometimes used to register partial revisions.

Table 3. Number of participating hospitals in the LROI

| Year              | Hip arthroplasty |                | Knee arthroplasty |                |
|-------------------|------------------|----------------|-------------------|----------------|
|                   | n                | Proportion (%) | n                 | Proportion (%) |
| 2007 <sup>a</sup> | 59               | 64             | 63                | 68             |
| 2008 <sup>a</sup> | 87               | 96             | 88                | 96             |
| 2009 <sup>a</sup> | 90               | 98             | 91                | 98             |
| 2010              | 91               | 99             | 92                | 99             |
| 2011              | 93               | 99             | 95                | 99             |
| 2012              | 95               | 100            | 100               | 100            |
| 2013              | 95               | 100            | 100               | 100            |

<sup>a</sup> The period 2007–2009 was the run-in phase of the LROI and therefore not all hospitals were participating.

Table 4. Check on the completeness of the LROI; comparison with data from Vektis (health insurance database)

|      | Hip arthroplasty |            |                  | Knee arthroplasty |            |                  |
|------|------------------|------------|------------------|-------------------|------------|------------------|
|      | LROI (n)         | Vektis (n) | Completeness (%) | LROI (n)          | Vektis (n) | Completeness (%) |
| 2009 | 27,134           | 30,779     | 88               | 19,055            | 21,536     | 88               |
| 2010 | 28,766           | 31,144     | 92               | 20,876            | 22,378     | 93               |
| 2011 | 29,561           | 31,784     | 93               | 21,892            | 23,609     | 93               |
| 2012 | 28,053           | 28,658     | 98               | 24,089            | 25,006     | 96               |

Table 5. Check on the completeness of the LROI; comparison with data from the hospital information system of each hospital

| Year | Primary hip arthroplasty |         |                  | Revision hip arthroplasty |         |                  | Primary knee arthroplasty |         |                  | Revision knee arthroplasty |         |                  |
|------|--------------------------|---------|------------------|---------------------------|---------|------------------|---------------------------|---------|------------------|----------------------------|---------|------------------|
|      | LROI (n)                 | HIS (n) | Completeness (%) | LROI (n)                  | HIS (n) | Completeness (%) | LROI (n)                  | HIS (n) | Completeness (%) | LROI (n)                   | HIS (n) | Completeness (%) |
| 2012 | 24,316                   | 25,412  | 96               | 3,214                     | 3,768   | 85               | 21,429                    | 22,556  | 95               | 1,608                      | 1,835   | 88               |
| 2013 | 25,736                   | 26,667  | 97               | 3,199                     | 3,617   | 88               | 23,985                    | 24,991  | 96               | 1,922                      | 2,125   | 90               |

Table 6. Number of missing and incorrectly coded variables in the LROI database in the period 2007–2013

|                                         | 2007–2009 |      | 2010–2011 |      | 2012–2013 |      | Total 2007–2013 <sup>a</sup> |      |
|-----------------------------------------|-----------|------|-----------|------|-----------|------|------------------------------|------|
|                                         | n         | %    | n         | %    | n         | %    | n                            | %    |
| Patient characteristics                 |           |      |           |      |           |      |                              |      |
| Personal identity number                | 30,968    | 29.7 | 13,467    | 12.7 | 11,519    | 9.9  | 55,954                       | 17.1 |
| Sex                                     | 375       | 0.4  | 304       | 0.3  | 731       | 0.6  | 1,410                        | 0.4  |
| Date of birth                           | 20        | 0.1  | 4         | 0.0  | 4         | 0.0  | 28                           | 0.0  |
| Hospital patient number                 | 135       | 0.1  | 186       | 0.2  | 505       | 0.4  | 826                          | 0.3  |
| Hip prosthesis surgery characteristics  |           |      |           |      |           |      |                              |      |
| Date of surgery                         |           |      |           |      |           |      | 117                          | 0.1  |
| Type of surgery (primary/ revision)     | 0         | 0.0  | 16        | 0.0  | 8         | 0.01 | 24                           | 0.0  |
| Side of surgery                         | 1         | 0.0  | 24        | 0.0  | 12        | 0.02 | 38                           | 0.0  |
| Diagnosis primary hip prosthesis        | 3,977     | 6.6  | 1,763     | 2.9  | 959       | 1.5  | 6,699                        | 3.6  |
| Any reason hip revision                 | 479       | 0.8  | 300       | 0.5  | 360       | 0.6  | 1,139                        | 0.6  |
| ASA score                               | 13,208    | 21.9 | 3,184     | 5.2  | 2,569     | 3.9  | 18,961                       | 9.8  |
| Type of prosthesis or revision          | 4,736     | 7.9  | 2,930     | 4.8  | 2,233     | 3.4  | 9,899                        | 5.2  |
| Conversion to total hip prosthesis      | 1,698     | 2.8  | 1,660     | 2.7  | 1,903     | 2.9  | 5,261                        | 2.8  |
| Fixation                                | 3,986     | 6.6  | 1,120     | 1.8  | 1,158     | 1.8  | 6,264                        | 3.3  |
| Product number                          |           |      |           |      |           |      |                              |      |
| Cement                                  | 8,801     | 14.6 | 2,240     | 3.7  | 1,302     | 2.0  | 12,343                       | 6.6  |
| Acetabulum                              | 1,155     | 1.9  | 762       | 1.3  | 397       | 1.1  | 2,614                        | 1.4  |
| Inlay                                   | 235       | 0.4  | 447       | 0.7  | 550       | 0.8  | 1,232                        | 0.7  |
| Femur                                   | 1,107     | 1.8  | 636       | 1.1  | 447       | 0.7  | 2,190                        | 1.2  |
| Femur head                              | 2,166     | 3.6  | 1,065     | 1.8  | 745       | 1.1  | 3,976                        | 2.1  |
| Knee prosthesis surgery characteristics |           |      |           |      |           |      |                              |      |
| Date of operation                       |           |      |           |      |           |      | 100                          | 0.1  |
| Type of operation                       | 0         | 0.0  | 18        | 0.0  | 15        | 0.0  | 33                           | 0.0  |
| Side of operation                       | 0         | 0.0  | 0         | 0.0  | 3         | 0.0  | 3                            | 0.0  |
| Diagnosis primary prosthesis            | 2,655     | 6.1  | 745       | 1.6  | 867       | 1.7  | 4,267                        | 3.0  |
| Any reason knee revision                | 241       | 0.6  | 149       | 0.3  | 202       | 0.4  | 592                          | 0.4  |
| ASA score                               | 9,945     | 22.9 | 1,833     | 4.0  | 1,695     | 3.3  | 13,473                       | 9.2  |
| Type of prosthesis or revision          | 3,811     | 8.8  | 1,732     | 3.8  | 1,616     | 3.1  | 7,058                        | 4.9  |
| Conversion to total knee prosthesis     | 884       | 2.0  | 773       | 1.7  | 1,019     | 2.0  | 2,676                        | 1.9  |
| Fixation                                | 3,278     | 7.6  | 693       | 1.5  | 852       | 1.7  | 4,823                        | 3.4  |
| Product number                          |           |      |           |      |           |      |                              |      |
| Cement                                  | 13,108    | 30.2 | 3,923     | 8.7  | 2,304     | 4.5  | 19,335                       | 13.8 |
| Femur                                   | 606       | 1.4  | 340       | 0.8  | 268       | 0.5  | 1,214                        | 0.9  |
| Inlay                                   | 34        | 0.1  | 26        | 0.1  | 42        | 0.1  | 102                          | 0.1  |
| Tibia                                   | 620       | 1.4  | 377       | 0.8  | 258       | 0.5  | 199                          | 0.1  |
| Patella                                 | 81        | 0.2  | 101       | 0.2  | 76        | 0.2  | 258                          | 0.2  |

<sup>a</sup> The total number of missing and incorrect values is not exactly the sum of the numbers per period for patient characteristics, since one patient can have undergone several surgeries, resulting in less missing or incorrect values for the patient characteristics.
